# Supplementary material for: Circular RNA PPP1CC promotes Porphyromonas gingivalis-lipopolysaccharide-induced pyroptosis of vascular smooth muscle cells by activating the HMGB1/TLR9/AIM2 pathway
Source: PubMed Central journal article supplement — J Int Med Res. 2021 Mar 26;49(3):0300060521996564. doi: 10.1177/0300060521996564 (PMC8165858; doi:10.1177/0300060521996564), 2021-03-26

## Certificate of Ethical Exemption

This paper was verified by the ethics committee and does not involve ethical issues, so the publication of this paper does not require ethical review.

Medical Ethics Committee of Liuzhou People's Hospital

2021.1.18

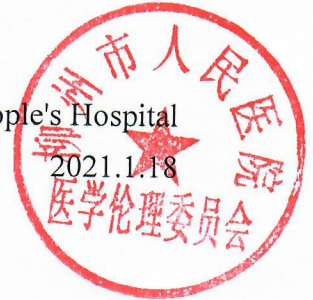

Supplement: sj-pdf-1-imr-10.1177_0300060521996564.pdf [file sj-pdf-1-imr-10.1177_0300060521996564.pdf]
